# Supplementary material for: Bi-Temporal Anodal Transcranial Direct Current Stimulation during Slow-Wave Sleep Boosts Slow-Wave Density but Not Memory Consolidation
Source: Brain Sci. 2021 Mar 24;11(4):410. doi: 10.3390/brainsci11040410 (PMC8064104; doi:10.3390/brainsci11040410)
Supplement: Supplementary file 1 [file brainsci-11-00410-s001.zip › brainsci-1090048-supplementary.pdf]

## Supplementary Tables

**Table S1.** SPM output list of significant clusters that are functionally connected with the seed mask (i.e. bilateral hippocampus).

| cluster-level         |                | peak-level            |       |     |     |     |
|-----------------------|----------------|-----------------------|-------|-----|-----|-----|
| p <sub>FWE-corr</sub> | k <sub>E</sub> | p <sub>FWE-corr</sub> | T     | x   | y   | z   |
| < 0.001               | 325290         | < 0.001               | 33.72 | -26 | -16 | -18 |
| < 0.001               | 1643           | < 0.001               | 15.86 | -42 | -70 | 36  |
| < 0.001               | 1322           | < 0.001               | 13.28 | 52  | -70 | 34  |
| < 0.001               | 376            | < 0.001               | 12.10 | -14 | -88 | -40 |
| < 0.001               | 486            | < 0.001               | 12.01 | 14  | -86 | -38 |
| < 0.001               | 881            | < 0.001               | 11.41 | 22  | 32  | 44  |
| < 0.001               | 759            | < 0.001               | 10.78 | -6  | -50 | -42 |
| < 0.001               | 346            | < 0.001               | 10.53 | 42  | -70 | -36 |
| < 0.001               | 5085           | < 0.001               | 9.95  | 36  | -26 | 56  |
| < 0.001               | 94             | < 0.001               | 7.93  | 44  | -20 | 22  |
| < 0.001               | 99             | < 0.001               | 7.65  | -46 | -70 | -38 |
| < 0.001               | 38             | < 0.001               | 6.62  | 0   | -22 | -20 |
| < 0.001               | 46             | 0.001                 | 6.26  | 0   | -34 | -24 |

**Table S2.** Participants' sleep habits (self-reports, retrospectively assessed using the PSQI) over four weeks of time prior the first recording session (excluding the night prior the first recording that was restricted to 5 hours). Sleep anticipation represents the difference between usual go to bed time and start time of the sleep EEG in minutes.

| Parameter              | mean   | sd    | min   | max   |
|------------------------|--------|-------|-------|-------|
| Go to bed time (hh:mm) | 23:34  | 00:36 | 22:15 | 00:30 |
| Sleep-onset time (min) | 12.222 | 7.760 | 2.5   | 30    |
| Sleep duration (hh:mm) | 07:08  | 0:44  | 6:00  | 8:00  |

  

|                          | sham <sup>1</sup> |       | tDCS   |       | tDCS vs. sham |      |
|--------------------------|-------------------|-------|--------|-------|---------------|------|
|                          | mean              | sd    | mean   | sd    | Z             | p    |
| Sleep anticipation (min) | 160.94            | 44.99 | 162.33 | 40.66 | -0.283        | .777 |

<sup>1</sup>Mean and standard deviation averaged across all 18 participants are reported separately for the sham and the tDCS condition, where applicable. Significance of the effect of stimulation (tDCS vs. sham) was tested by using non-parametric Wilcoxon-test.
